# Supplementary material for: Influence of Environmental Factors on the Genetic and Chemical Diversity of Brickellia veronicifolia Populations Growing in Fragmented Shrublands from Mexico
Source: PubMed Central journal article supplement (PMC7915050; doi:10.3390/plants10020325), 2021-02-08
Supplement: plants-10-00325-s001.pdf [file plants-10-00325-s001.pdf]

SUPPLEMENTARY MATERIAL

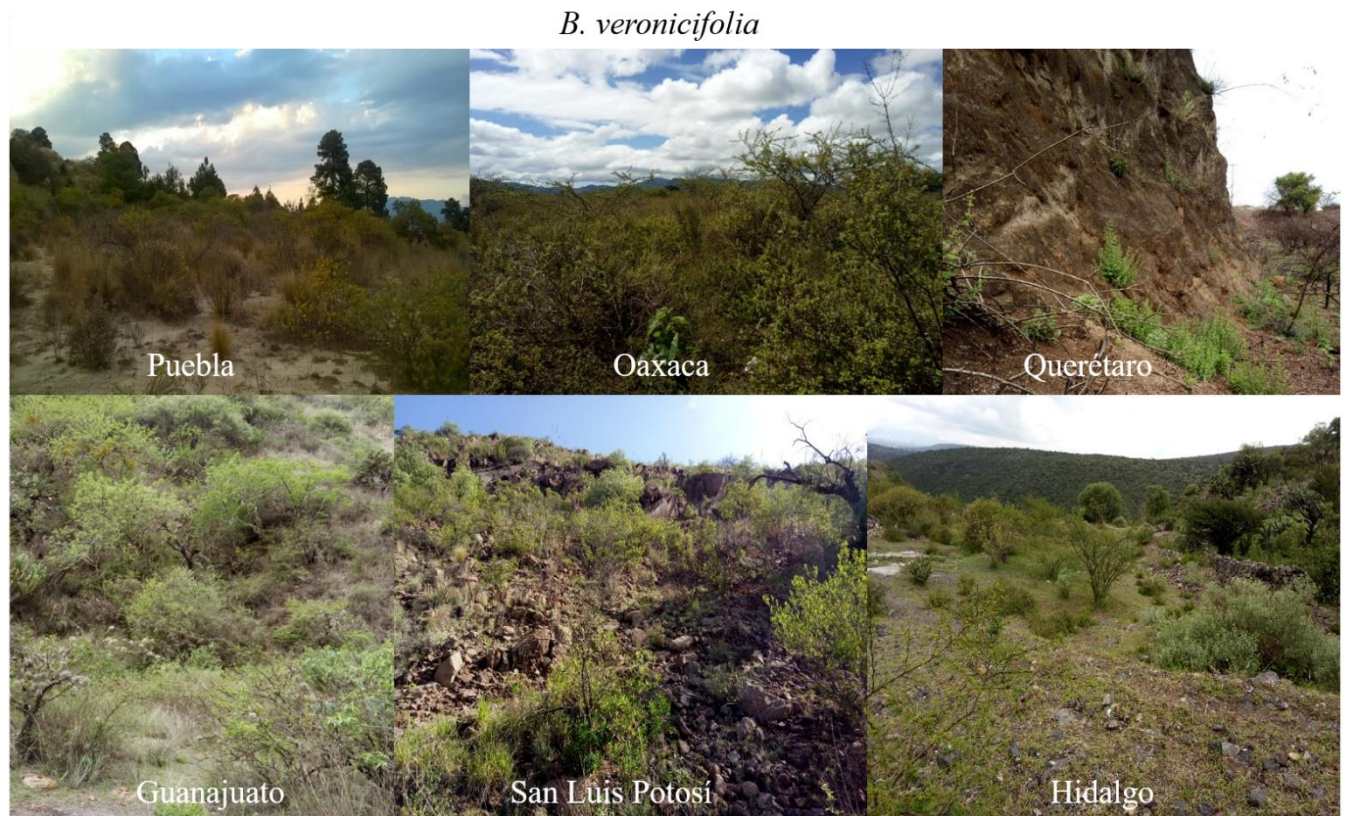

**Figure S1:** *Brickellia veronicifolia* grown in xerophytic shrublands located in different provinces from Mexico.

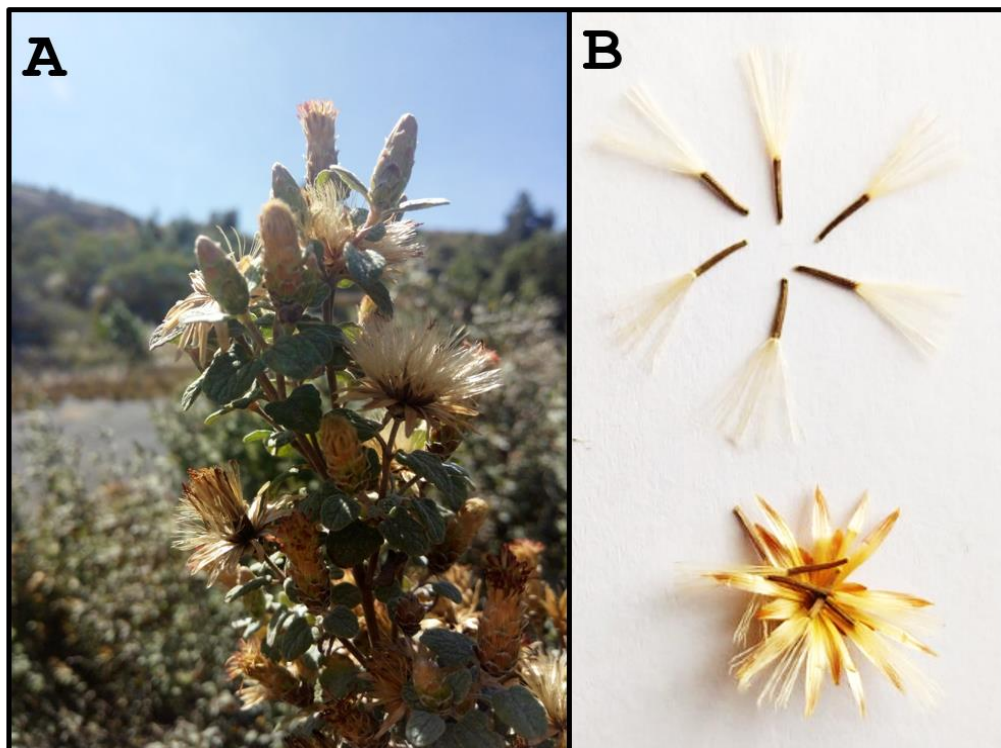

**Figure S2:** A) Inflorescences of *B. veronicifolia* under wild conditions, B) Winged achenes of *B. veronicifolia*.

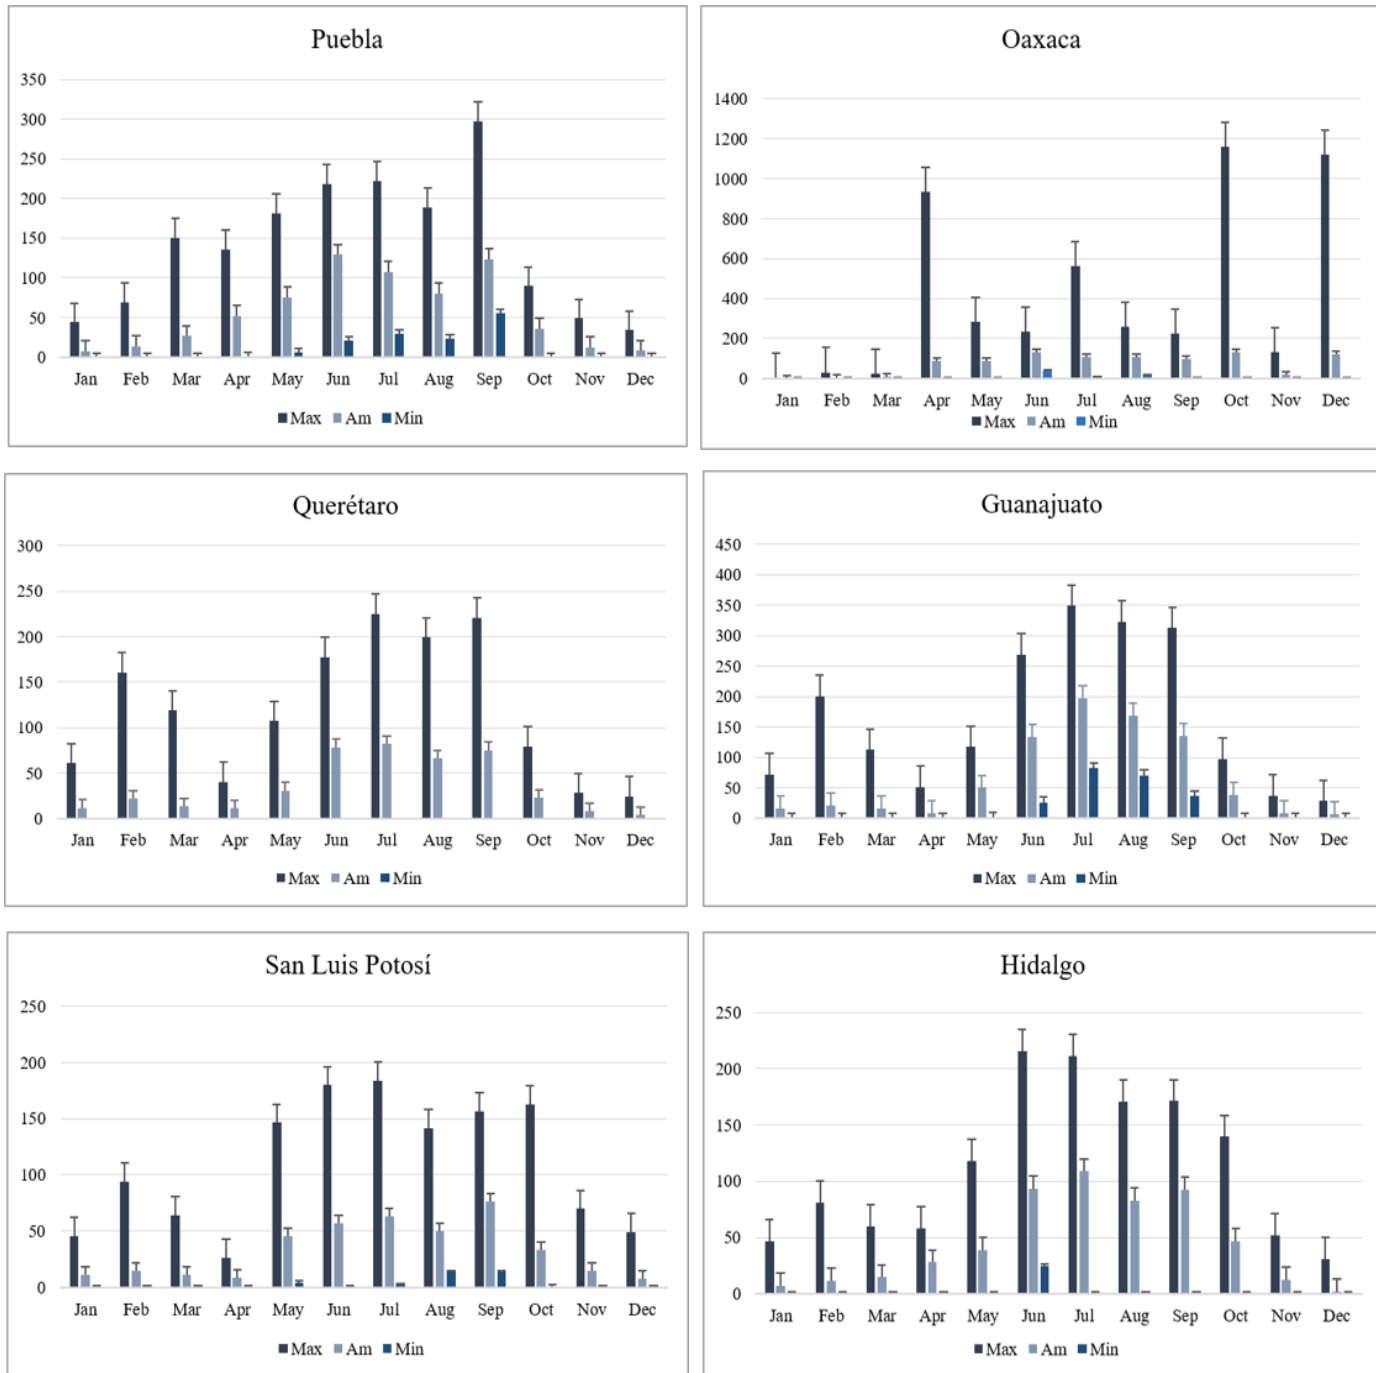

**Figure S3:** Monthly precipitation (mm; 2000-2017) for different populations of *B. veronicifolia* grown in Mexico (CONAGUA, 2018).

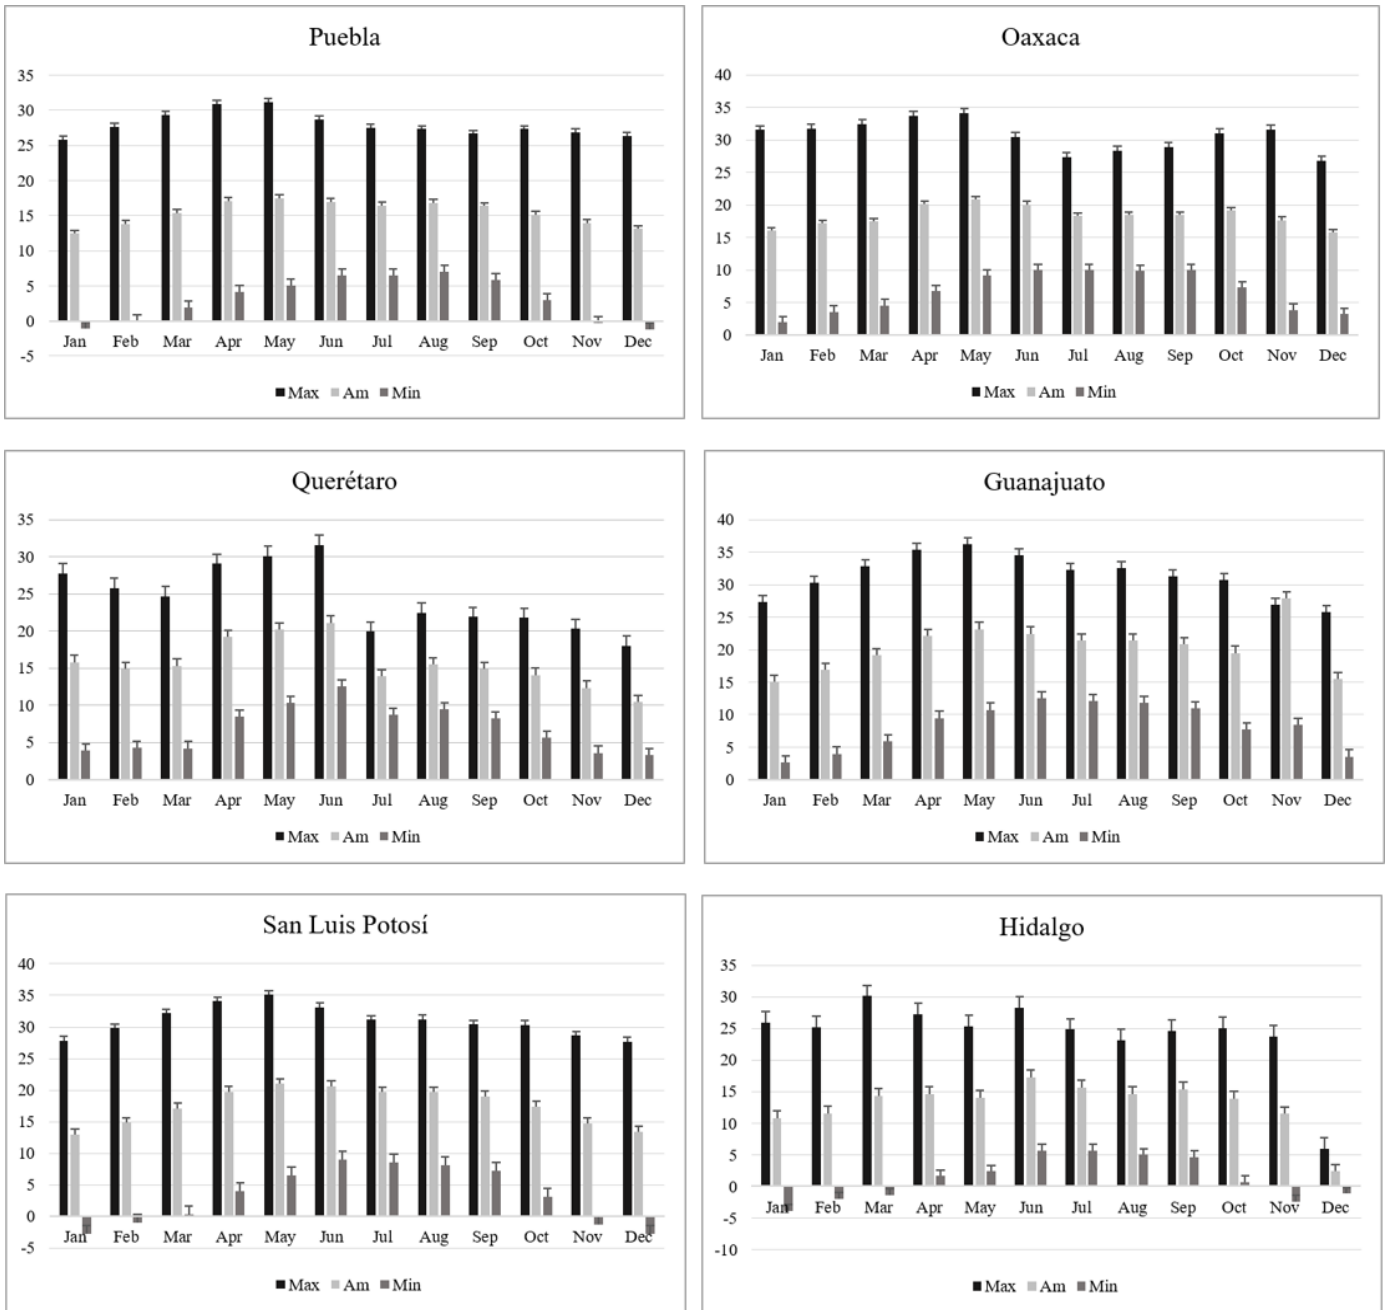

**Figure S4:** Monthly temperature variation (°C) from 2000-2017 by *B. veronicifolia* studied population (CONAGUA, 2018).

**Table S1:** Volatile constituents of the essential oil from *Brickellia veronicifolia* by population.

| #<br>Peak | RT<br>mean | Compound                       | PUEBLA |        |           | OAXACA |        |          | QUERETARO |        |          | GUANAJUATO |        |          | SAN LUIS POTOSÍ |        |          | HIDALGO |        |          |
|-----------|------------|--------------------------------|--------|--------|-----------|--------|--------|----------|-----------|--------|----------|------------|--------|----------|-----------------|--------|----------|---------|--------|----------|
|           |            |                                | RRI-1  | RRI-2  | (%) RA    | RRI-1  | RRI-2  | (%) RA   | RRI-1     | RRI-2  | (%) RA   | RRI-1      | RRI-2  | (%) RA   | RRI-1           | RRI-2  | (%) RA   | RRI-1   | RRI-2  | (%) RA   |
| 1         | 8.50       | D-Limonene                     | -      | -      | -         | 1024.2 | 1031.0 | 0.25±0.2 | -         | -      | -        | -          | -      | -        | -               | -      | -        | -       | -      | -        |
| 2         | 11.88      | β-Linalool                     | 1099.6 | 1098.0 | 0.08 ±0.4 | 1099.7 | 1098.0 | 0.09±0.2 | 1099.6    | 1098.0 | 0.07±0.0 | 1099.8     | 1098.0 | 0.06±0.0 | 1099.6          | 1098.0 | 0.11±0.0 | 1099.5  | 1098.0 | 0.11±0.0 |
| 3         | 12.43      | Isopulegol                     | -      | -      | -         | 1117.6 | 1145.0 | 0.03±0.0 | -         | -      | -        | -          | -      | -        | 1118.1          | 1145.0 | 0.02±0.0 | -       | -      | -        |
| 4         | 12.82      | cis-Carvotanacetol             | 1166.8 | 1199.0 | 0.01±0.0  | -      | -      | -        | 1117.8    | 1199.0 | 0.01±0.0 | 1117.5     | 1199.0 | 0.02±0.0 | 1117.8          | 1199.0 | 0.01±0.0 | -       | -      | -        |
| 5         | 13.47      | cis-Verbenol                   | -      | -      | -         | -      | -      | -        | 1149.8    | 1142.0 | 0.07±0.0 | -          | -      | -        | 1149.8          | 1142.0 | 0.05±0.0 | 1149.8  | 1142.0 | 0.02±0.0 |
| 6         | 13.98      | cis-Carveol                    | 1167.2 | 1229.0 | 0.01±0.0  | -      | -      | -        | 1246.2    | 1229.0 | 0.02±0.0 | 1139.3     | 1229.0 | 0.02±0.0 | 1127.1          | 1229.0 | 0.01±0.0 | -       | -      | -        |
| 7         | 14.18      | (±)-Lavandulol                 | -      | -      | -         | -      | -      | -        | -         | -      | -        | -          | -      | -        | 1172.2          | 1166.0 | 0.08±0.0 | -       | -      | -        |
| 8         | 14.19      | cis-Geraniol                   | -      | -      | -         | -      | -      | -        | 1172.7    | 1240.0 | 0.02±0.0 | 1172.7     | 1240.0 | 0.01±0.0 | 1172.7          | 1240.0 | 0.03±0.0 | 1172.7  | 1240.0 | 0.02±0.0 |
| 9         | 14.20      | cis-2-p-Menthen-1-ol           | -      | -      | -         | -      | -      | -        | 1173.0    | 1166.0 | 0.02±0.0 | -          | -      | -        | -               | -      | -        | -       | -      | -        |
| 10        | 14.20      | 5-Caranol,<br>trans,trans-(+)- | -      | -      | -         | -      | -      | -        | 1173.0    | 1286.0 | 0.01±0.0 | -          | -      | -        | -               | -      | -        | -       | -      | -        |
| 11        | 14.41      | Terpinen-4-ol                  | 1179.7 | 1177.0 | 0.01±0.0  | -      | -      | -        | 1179.7    | 1177.0 | 0.05±0.0 | 1179.8     | 1177.0 | 0.02±0.0 | 1179.6          | 1177.0 | 0.14±0.0 | 1179.7  | 1177.0 | 0.06±0.0 |
| 12        | 14.60      | p-Menth-8(10)-ene-<br>2,9-diol | 1185.9 | 1179.0 | 0.02±0.1  | 1176.5 | 1179.0 | 0.04±0.0 | 1186.0    | 1179.0 | 0.04±0.0 | 1186.0     | 1179.0 | 0.04±0.0 | -               | -      | -        | 1185.9  | 1179.0 | 0.01±0.0 |
| 13        | 14.62      | p-Cymen-8-ol                   | -      | -      | -         | -      | -      | -        | 1186.2    | 1183.0 | 0.09±0.0 | -          | -      | -        | 1186.3          | 1183.0 | 0.14±0.0 | -       | -      | -        |
| 14        | 14.76      | α-Terpineol                    | 1190.9 | 1198.0 | 0.02±0.0  | -      | -      | -        | 1191.1    | 1198.0 | 0.03±0.0 | 1191.0     | 1198.0 | 0.01±0.0 | 1191.0          | 1198.0 | 0.06±0.0 | 1191.0  | 1198.0 | 0.04±0.0 |
| 15        | 14.90      | Myrtenol                       | -      | -      | -         | -      | -      | -        | 1195.2    | 1194.0 | 0.06±0.0 | -          | -      | -        | 1194.6          | 1194.0 | 0.14±0.0 | 1195.3  | 1194.0 | 0.05±0.0 |
| 16        | 15.09      | endo-Borneol                   | -      | -      | -         | -      | -      | -        | 1201.6    | 1165.0 | 0.03±0.0 | -          | -      | -        | -               | -      | -        | -       | -      | -        |
| 17        | 15.22      | Verbenone                      | -      | -      | -         | -      | -      | -        | 1208.0    | 1204.0 | 0.05±0.0 | 1208.1     | 1204.0 | 0.05±0.0 | 1208.1          | 1204.0 | 0.07±0.0 | 1208.0  | 1204.0 | 0.04±0.0 |

|    |       |                              |        |        |          |        |        |          |        |        |          |        |          |          |        |          |          |        |          |          |
|----|-------|------------------------------|--------|--------|----------|--------|--------|----------|--------|--------|----------|--------|----------|----------|--------|----------|----------|--------|----------|----------|
| 18 | 15.22 | Ascaridole epoxide           | -      | -      | -        | -      | -      | -        | -      | -      | 1208.1   | 1296.0 | 0.01±0.0 | -        | -      | -        | -        | -      | -        |          |
| 19 | 15.85 | cis-3-Hexenyl<br>isovalerate | 1236.2 | 1241.0 | 0.02±0.1 | -      | -      | -        | 1239.3 | 1241.0 | 0.04±0.0 | 1239.5 | 1241.0   | 0.02±0.0 | 1239.3 | 1241.0   | 0.04±0.0 | 1237.7 | 1241.0   | 0.02±0.0 |
| 20 | 16.01 | D-Carvone                    | -      | -      | -        | -      | -      | -        | -      | -      | -        | -      | -        | 1246.0   | 1243.0 | 0.01±0.0 | -        | -      | -        |          |
| 21 | 16.10 | cis-3-Hexenyl<br>valerate    | -      | -      | -        | -      | -      | -        | -      | -      | -        | -      | -        | -        | -      | -        | 1250.4   | 1230.0 | 0.06±0.0 |          |
| 22 | 16.15 | p-Menthane-1,2,3-<br>triol   | -      | -      | -        | -      | -      | -        | 1252.7 | 1485.0 | 0.02±0.0 | 1252.9 | 1485.0   | 0.01±0.0 | -      | -        | -        | -      | -        | -        |
| 23 | 16.69 | β-citral                     | 1273.0 | 1240.0 | 0.01±0.0 | -      | -      | -        | -      | -      | -        | -      | -        | 1273.0   | 1240.0 | 0.11±0.0 | 1279.5   | 1240.0 | 0.01±0.0 |          |
| 24 | 16.80 | Carotol                      | -      | -      | -        | -      | -      | -        | 1292.5 | 1549.0 | 0.02±0.0 | -      | -        | -        | -      | -        | -        | -      | -        |          |
| 25 | 17.57 | Myrtenyl acetate             | -      | -      | -        | -      | -      | -        | 1327.0 | 1235.0 | 0.08±0.0 | -      | -        | -        | 1327.3 | 1235.0   | 0.37±0.4 | -      | -        | -        |
| 26 | 17.64 | Isolongifolene               | 1335.9 | 1387.0 | 0.03±0.0 | -      | -      | -        | 1327.3 | 1387.0 | 0.07±0.0 | -      | -        | -        | -      | -        | -        | -      | -        |          |
| 27 | 17.70 | (+)-Sativene                 | -      | -      | -        | 1337.9 | 1339.0 | 0.02±0.0 | 1336.4 | 1339.0 | 0.02±0.0 | 1336.4 | 1339.0   | 0.02±0.0 | 1328.9 | 1339.0   | 0.03±0.0 | 1337.4 | 1339.0   | 0.02±0.0 |
| 28 | 17.81 | γ-Elemene                    | 1340.5 | 1430.0 | 1.10±1.7 | 1343.4 | 1430.0 | 0.05±0.0 | 1340.2 | 1430.0 | 0.06±0.0 | 1340.4 | 1430.0   | 0.09±0.0 | -      | -        | -        | 1344.0 | 1430.0   | 2.84±1.6 |
| 29 | 18.00 | α-Cubebene                   | -      | -      | -        | 1353.5 | 1351.0 | 0.92±1.1 | 1352.9 | 1351.0 | 0.37±0.2 | 1352.9 | 1351.0   | 0.09±0.2 | -      | -        | -        | 1353.1 | 1351.0   | 0.47±0.2 |
| 30 | 18.06 | α-Longipinene                | 1358.8 | 1351.0 | 0.38±0.3 | -      | -      | -        | -      | -      | -        | -      | -        | 1355.9   | 1351.0 | 0.94±1.1 | -        | -      | -        |          |
| 31 | 18.16 | β-Neoclovene                 | 1363.1 | 1454.0 | 0.17±0.0 | 1363.0 | 1454.0 | 0.01±0.0 | -      | -      | -        | -      | -        | 1362.6   | 1454.0 | 0.38±0.2 | -        | -      | -        |          |
| 32 | 18.16 | Isocaryophyllene             | -      | -      | -        | 1363.2 | 1407.0 | 0.01±0.0 | -      | -      | -        | -      | -        | -        | -      | -        | -        | -      | -        |          |
| 33 | 18.28 | (+)- Longifolene             | -      | -      | -        | -      | -      | -        | -      | -      | -        | -      | -        | 1370.5   | 1402.0 | 0.27±0.3 | -        | -      | -        |          |
| 34 | 18.28 | (+)-Cyclosativene            | 1370.3 | 1367.0 | 0.74±0.2 | -      | -      | -        | -      | -      | -        | -      | -        | -        | -      | -        | 1370.3   | 1367.0 | 0.06±0.1 |          |
| 35 | 18.33 | α-ylangene                   | 1361.3 | 1382.0 | 1.02±1.4 | 1376.0 | 1382.0 | 0.16±0.1 | 1379.7 | 1382.0 | 1.82±0.0 | 1375.0 | 1382.0   | 0.06±0.0 | 1373.8 | 1382.0   | 0.11±0.0 | 1375.2 | 1382.0   | 0.01±0.0 |
| 36 | 18.26 | Longicyclene                 | -      | -      | -        | 1363.1 | 1373.0 | 0.02±0.0 | -      | -      | -        | -      | -        | -        | 1374.9 | 1373.0   | 0.21±0.1 | -      | -        | -        |
| 37 | 18.45 | α-copaene                    | 1381.7 | 1376.0 | 2.56±1.8 | 1380.4 | 1376.0 | 1.02±0.3 | 1384.1 | 1376.0 | 0.31±0.6 | 1379.6 | 1376.0   | 1.78±1.0 | 1379.4 | 1376.0   | 1.28±0.3 | 1379.6 | 1376.0   | 1.65±0.6 |
| 38 | 18.36 | α-Gurjunene                  | 1335.5 | 1409.0 | 0.14±0.0 | 1412.4 | 1409.0 | 0.18±0.0 | -      | -      | -        | -      | -        | -        | -      | -        | -        | 1413.8 | 1409.0   | 0.33±0.0 |



|    |       |                                 |        |        |          |        |        |          |        |        |          |        |        |          |        |        |          |        |        |           |
|----|-------|---------------------------------|--------|--------|----------|--------|--------|----------|--------|--------|----------|--------|--------|----------|--------|--------|----------|--------|--------|-----------|
| 60 | 19.51 | Aromandendrene                  | 1440.5 | 1440.0 | 0.45±0.0 | 1441.4 | 1440.0 | 0.70±0.5 | 1440.2 | 1440.0 | 0.34±0.1 | 1444.4 | 1440.0 | 0.77±0.8 | 1440.2 | 1440.0 | 0.26±0.2 | 1440.6 | 1440.0 | 0.37±0.0  |
| 61 | 19.78 | Humulene                        | 1455.5 | 1440.0 | 1.55±0.7 | 1459.6 | 1440.0 | 1.82±0.7 | 1455.2 | 1440.0 | 1.28±0.4 | 1455.1 | 1440.0 | 0.89±0.9 | 1455.2 | 1440.0 | 0.90±0.5 | 1455.7 | 1440.0 | 1.64±0.8  |
| 62 | 20.12 | γ-Murolene                      | 1480.4 | 1477.0 | 1.20±1.7 | 1454.1 | 1477.0 | 3.59±1.4 | 1478.7 | 1477.0 | 1.77±0.5 | 1478.6 | 1477.0 | 1.01±0.9 | 1478.6 | 1477.0 | 1.33±0.5 | 1479.9 | 1477.0 | 0.48±1.6  |
| 63 | 20.44 | (+)-Ledene                      | 1487.4 | 1493.0 | 0.38±0.2 | 1441.7 | 1493.0 | 1.19±2.0 | 1485.3 | 1493.0 | 0.16±0.1 | 1435.9 | 1493.0 | 0.01±0.0 | 1468.8 | 1493.0 | 0.36±0.0 | 1487.3 | 1493.0 | 0.37±5.6  |
| 64 | 20.50 | α-Curcumene                     | -      | -      | -        | 1484.7 | 1483.0 | 2.14±0.1 | -      | -      | -        | -      | -      | -        | 1505.4 | 1483.0 | 1.74±0.8 | -      | -      | -         |
| 65 | 20.64 | γ-Elemene                       | -      | -      | -        | -      | -      | -        | -      | -      | -        | -      | -      | -        | -      | -      | -        | 1502.2 | 1430.0 | 0.92±3.7  |
| 66 | 20.63 | Cubedol                         | 1501.0 | 1580.0 | 5.59±4.4 | 1500.6 | 1580.0 | 4.54±0.8 | 1501.1 | 1580.0 | 7.15±6.1 | 1500.3 | 1580.0 | 6.51±6.6 | 1500.7 | 1580.0 | 7.45±4.5 | 1505.6 | 1580.0 | 9.07±3.7  |
| 67 | 20.84 | γ-Cadinene                      | 1516.9 | 1513.0 | 1.85±1.7 | 1518.4 | 1513.0 | 4.55±2.6 | -      | -      | -        | -      | -      | -        | 1516.4 | 1513.0 | 1.94±0.5 | 1484.3 | 1513.0 | 18.32±2.2 |
| 68 | 20.86 | α-Himachalene                   | -      | -      | -        | 1511.6 | 1447.0 | 0.25±0.2 | -      | -      | -        | -      | -      | -        | 1509.7 | 1447.0 | 0.30±0.1 | -      | -      | -         |
| 69 | 21.19 | trans-calamenene                | -      | -      | -        | -      | -      | -        | -      | -      | -        | 1523.6 | 1528.0 | 1.27±0.7 | 1524.1 | 1528.0 | 1.32±0.7 | -      | -      | -         |
| 70 | 21.21 | (+)-δ-Cadinene                  | 1524.6 | 1524.0 | 5.40±2.4 | 1525.4 | 1524.0 | 2.44±1.5 | 1525.9 | 1524.0 | 1.88±0.4 | 1526.1 | 1524.0 | 1.93±1.1 | -      | -      | -        | 1524.4 | 1524.0 | 3.03±3.7  |
| 71 | 21.37 | α-acorenol                      | -      | -      | -        | -      | -      | -        | 1509.2 | 1629.0 | 0.13±0.0 | 1340.6 | 1629.0 | 0.02±0.0 | 1645.4 | 1629.0 | 2.11±1.4 | 1554.5 | 1629.0 | 0.79±0.3  |
| 72 | 21.55 | γ-Himachalene                   | -      | -      | -        | -      | -      | -        | -      | -      | -        | -      | -      | -        | 1537.8 | 1475.0 | 0.37±0.2 | -      | -      | -         |
| 73 | 21.54 | α-Cadinene                      | 1537.1 | 1538.0 | 0.56±0.2 | 1537.1 | 1538.0 | 0.14±0.0 | -      | -      | -        | -      | -      | -        | -      | -      | -        | 1537.8 | 1538.0 | 1.18±0.1  |
| 74 | 21.74 | 4-epi-cubedol                   | 1550.4 | 1494.0 | 1.45±2.5 | 1525.3 | 1494.0 | 0.18±0.1 | 1559.6 | 1494.0 | 0.20±0.1 | 1534.8 | 1494.0 | 0.63±0.2 | 1582.6 | 1494.0 | 0.19±0.1 | 1531.2 | 1494.0 | 0.02±0.0  |
| 75 | 21.81 | Murolan-3,9(11)-diene-10-peroxy | -      | -      | -        | -      | -      | -        | -      | -      | -        | -      | -      | -        | 1548.1 | 1730.0 | 0.46±1.0 | -      | -      | -         |
| 76 | 21.88 | Longiverbenone                  | -      | -      | -        | -      | -      | -        | 1541.2 | 2148.0 | 0.76±0.7 | 1560.5 | 2148.0 | 0.08±0.1 | -      | -      | -        | -      | -      | -         |
| 77 | 22.04 | 6-epi-shyobunol                 | -      | -      | -        | -      | -      | -        | -      | -      | -        | -      | -      | -        | 1319.1 | 1517.0 | 0.01±0.0 | 1691.1 | 1517.0 | 1.77±0.2  |
| 78 | 22.16 | Nerolidyl acetate               | -      | -      | -        | -      | -      | -        | 1562.1 | 1675.0 | 1.27±0.4 | 1561.5 | 1675.0 | 0.74±0.2 | -      | -      | -        | 1561.8 | 1675.0 | 0.07±0.3  |
| 79 | 22.27 | Nerolidol                       | -      | -      | -        | -      | -      | -        | 1565.1 | 1560.0 | 0.14±0.2 | -      | -      | -        | 1564.7 | 1560.0 | 1.07±0.7 | 1569.0 | 1560.0 | 0.18±0.3  |
| 80 | 22.34 | Aristolene epoxide              | 1568.7 | 1747.0 | 0.14±0.4 | -      | -      | -        | -      | -      | -        | -      | -      | -        | -      | -      | -        | -      | -      | -         |
| 81 | 22.35 | Epiglobulol                     | -      | -      | -        | -      | -      | -        | -      | -      | -        | -      | -      | -        | 1569.4 | 1588.0 | 0.88±0.7 | -      | -      | -         |

|     |       |                         |        |        |           |        |        |           |        |        |           |        |        |           |        |        |            |        |        |           |
|-----|-------|-------------------------|--------|--------|-----------|--------|--------|-----------|--------|--------|-----------|--------|--------|-----------|--------|--------|------------|--------|--------|-----------|
| 82  | 22.51 | Globulol                | 1576.0 | 1576.0 | 0.33±0.4  | 1583.1 | 1576.0 | 0.70±0.0  | 1576.8 | 1576.0 | 1.75±0.6  | 1568.4 | 1576.0 | 0.79±0.4  | 1574.8 | 1576.0 | 0.76±0.5   | 1571.7 | 1576.0 | 8.08±4.4  |
| 83  | 22.77 | (-)-Spathulenol         | 1584.6 | 1576.0 | 13.74±5.8 | 1586.7 | 1576.0 | 18.34±6.7 | 1585.2 | 1576.0 | 14.93±1.4 | 1583.6 | 1576.0 | 11.47±4.5 | 1587.0 | 1576.0 | 11.17±5.8  | 1586.5 | 1576.0 | 7.44±3.4  |
| 84  | 22.91 | Caryophyllene oxide     | 1590.2 | 1581.0 | 9.82±2.2  | 1592.2 | 1581.0 | 15.95±2.8 | 1590.1 | 1581.0 | 20.14±3.9 | 1589.4 | 1581.0 | 19.31±5.0 | 1592.0 | 1581.0 | 15.73±11.9 | 1592.9 | 1581.0 | 2.92±5.5  |
| 85  | 23.11 | Ledol                   | 1597.8 | 1565.0 | 1.28±0.3  | 1598.9 | 1565.0 | 0.90±0.6  | 1598.0 | 1565.0 | 1.80±0.9  | 1597.2 | 1565.0 | 0.90±0.5  | 1599.2 | 1565.0 | 1.74±1.0   | 1600.5 | 1565.0 | 2.02±0.3  |
| 86  | 23.22 | Guaiol                  | -      | -      | -         | -      | -      | -         | -      | -      | -         | 1602.2 | 1595.0 | 0.16±0.3  | -      | -      | -          | -      | -      | -         |
| 87  | 23.43 | Viridiflorol            | 1607.5 | 1590.0 | 1.10±0.7  | -      | -      | -         | 1607.3 | 1590.0 | 1.93±1.0  | -      | -      | -         | -      | -      | -          | 1608.3 | 1590.0 | 0.28±0.8  |
| 88  | 23.49 | Humulene-1,6-dien-3-ol  | -      | -      | -         | -      | -      | -         | -      | -      | -         | -      | -      | -         | -      | -      | -          | 1609.1 | 1619.0 | 0.61±1.2  |
| 89  | 23.67 | Calarene epoxide        | 1612.9 | 1671.0 | 0.24±0.7  | -      | -      | -         | 1613.3 | 1671.0 | 0.50±0.7  | 1615.3 | 1671.0 | 0.11±0.1  | -      | -      | -          | -      | -      | -         |
| 90  | 23.88 | Drimenol                | -      | -      | -         | -      | -      | -         | 1619.2 | 1752.0 | 0.86±0.2  | -      | -      | -         | 1619.4 | 1752.0 | 0.83±0.4   | 1619.8 | 1752.0 | 0.09±0.3  |
| 91  | 24.14 | Diepicedrene-1-oxide    | -      | -      | -         | 1614.0 | 1548.0 | 0.24±0.7  | 1611.8 | 1548.0 | 2.12±1.2  | 1611.2 | 1548.0 | 0.80±1.0  | 1612.0 | 1548.0 | 2.56±1.5   | 1681.9 | 1548.0 | 1.00±0.1  |
| 92  | 24.05 | 9-Methoxycalamene       | 1542.5 | 1484.0 | 0.61±0.3  | -      | -      | -         | 1664.8 | 1484.0 | 0.53±0.3  | 1664.9 | 1484.0 | 0.42±0.2  | 1666.2 | 1484.0 | 0.47±0.2   | 1542.7 | 1484.0 | 0.85±0.0  |
| 93  | 24.31 | β-Ionol                 | -      | -      | -         | -      | -      | -         | 1630.8 | 1406.0 | 0.30±0.1  | 1630.3 | 1406.0 | 0.42±0.1  | -      | -      | -          | -      | -      | -         |
| 94  | 24.61 | Alloaromadendrene oxide | 1624.6 | 1625.0 | 0.62±0.6  | 1669.9 | 1625.0 | 0.14±0.0  | 1625.1 | 1625.2 | 0.95±0.8  | -      | -      | -         | 1606.3 | 1625.0 | 0.27±0.4   | -      | -      | -         |
| 95  | 24.67 | tau-Muurolol            | 1640.5 | 1640.0 | 8.88±5.6  | 1638.1 | 1640.0 | 2.57±5.6  | 1640.6 | 1640.0 | 6.01±3.0  | 1640.4 | 1640.0 | 4.11±3.6  | 1639.6 | 1640.0 | 5.99±4.6   | 1640.8 | 1640.0 | 1.28±3.8  |
| 96  | 24.73 | tau-cadinol             | 1641.1 | 1642.0 | 1.80±5.5  | 1642.8 | 1642.0 | 4.82±1.6  | -      | -      | -         | -      | -      | -         | 1640.8 | 1642.0 | 11.67±3.4  | -      | -      | -         |
| 97  | 24.77 | (-)-Isolongifolol       | 1636.9 | 1723.0 | 0.52±0.5  | 1630.5 | 1723.0 | 0.81±0.8  | 1663.5 | 1723.0 | 0.52±0.2  | 1640.6 | 1723.0 | 1.32±0.5  | 1644.5 | 1723.0 | 1.00±2.5   | 1662.4 | 1723.0 | 0.77±0.2  |
| 98  | 24.80 | (-)-δ-Cadinol           | -      | -      | -         | -      | -      | -         | -      | -      | -         | -      | -      | -         | 1643.2 | 1636.0 | 1.43±1.0   | -      | -      | -         |
| 99  | 24.83 | δ-Cedrol                | 1644.2 | 1621.0 | 1.37±0.8  | 1643.4 | 1621.0 | 0.75±0.8  | 1643.8 | 1621.0 | 2.88±2.6  | 1644.9 | 1621.0 | 2.40±2.3  | 1644.3 | 1621.0 | 1.43±0.7   | 1644.7 | 1621.0 | 2.20±1.0  |
| 100 | 25.01 | Z-9-Pentadecenol        | -      | -      | -         | -      | -      | -         | 1648.3 | 1742.0 | 1.25±0.4  | 1648.4 | 1742.0 | 0.61±0.5  | 1648.5 | 1742.0 | 0.66±0.3   | 1650.0 | 1742.0 | 2.24±0.2  |
| 101 | 25.15 | α-Cadinol               | 1654.6 | 1653.0 | 9.91±1.7  | 1653.2 | 1653.0 | 1.694±2.3 | 1652.5 | 1653.0 | 7.18±3.3  | 1652.3 | 1653.0 | 5.96±3.2  | 1650.8 | 1653.0 | 5.80±1.9   | 1651.7 | 1653.0 | 11.68±3.5 |
| 102 | 25.75 | Longifolenaldehyde      | 1603.9 | 1601.0 | 1.26±0.5  | 1604.3 | 1601.0 | 0.10±0.0  | 1602.4 | 1601.0 | 0.70±0.3  | 1600.5 | 1601.0 | 0.36±0.2  | 1717.6 | 1601.0 | 0.16±0.1   | 1662.2 | 1601.0 | 0.44±0.2  |



|     |       |                               |        |        |          |        |        |          |        |        |          |        |        |          |        |        |          |        |        |          |
|-----|-------|-------------------------------|--------|--------|----------|--------|--------|----------|--------|--------|----------|--------|--------|----------|--------|--------|----------|--------|--------|----------|
| 103 | 25.84 | Patchoulol                    | -      | -      | -        | -      | -      | -        | -      | -      | -        | -      | -      | -        | 1670.5 | 1664.0 | 1.02±0.5 | -      | -      | -        |
| 104 | 26.25 | α-Bisabolol                   | -      | -      | -        | -      | -      | -        | -      | -      | -        | 1681.0 | 1683.0 | 0.29±0.2 | 1681.5 | 1883.0 | 0.40±0.4 | 1681.3 | 1683.0 | 0.11±0.3 |
| 105 | 26.97 | Aromadendrene<br>oxide        | 1747.4 | 1702.0 | 0.20±0.0 | 1728.9 | 1702.0 | 0.19±0.4 | -      | -      | -        | 1748.4 | 1702.0 | 0.68±0.4 | 1767.8 | 1702.0 | 0.31±0.1 | 1662.2 | 1702.0 | 1.09±0.4 |
| 106 | 29.25 | Corymbolone                   | 1740.2 | 1892.0 | 0.35±0.2 | 1721.7 | 1892.0 | 0.83±0.1 | 1737.8 | 1892.0 | 0.37±0.3 | -      | -      | -        | 1738.1 | 1892.0 | 0.12±0.2 | 1800.9 | 1892.0 | 0.02±0.0 |
| 107 | 30.23 | cis-Z-α-Bisabolene<br>epoxide | -      | -      | -        | 1778.6 | 1743.0 | 0.14±0.3 | 1777.2 | 1743.0 | 0.59±0.1 | 1777.4 | 1743.0 | 0.54±0.2 | 1775.9 | 1743.0 | 0.55±0.1 | -      | -      | -        |
| 108 | 33.29 | Geranyl-p-cymene              | 1959.1 | 2006.0 | 0.36±0.2 | -      | -      | -        | -      | -      | -        | -      | -      | -        | 1959.1 | 2006.0 | 0.07±0.0 | 1959.1 | 2006.0 | 0.03±0.1 |

Compounds identified by the estimation of RRI-1 and RRI-2, relative retention index for DB-5 and HP-5 columns, respectively. (%) RA: relative abundance. A dash (-) indicates the absence of the component. Shadow areas show the 6 more abundant compounds and enclosed are the specific compounds of each population.

**Table S2:** iPBS primers used in the detection of polymorphism among six populations of *Brickellia veronicifolia*.

| iPBS Marker | Sequence (5'-3')          | Ta (°C) |
|-------------|---------------------------|---------|
| 1846        | CTGGCATTTCATTGTTCGTCGATGC | 55.5    |
| 1880        | GAACTCCCTGGTGGCATCGTGAGC  | 60.5    |
| 2074        | GCTCTGATACCA              | 50.0    |
| 2075        | CTCATGATGCCA              | 51.2    |
| 2076        | GCTCCGATGCCA              | 49.0    |
| 2077        | CTCACGATGCCA              | 50.5    |
| 2078        | GCGGAGTCGCCA              | 55.0    |
| 2080        | CAGACGGCGCCA              | 55.0    |
| 2081        | GCAACGGCGCCA              | 58.0    |
| 2232        | AGAGAGGCTCGGATACCA        | 53.0    |
| 2249        | AACCGACCTCTGATACCA        | 51.0    |
| 2378        | GGTCCTCATCCA              | 53.0    |

Ta: alignment temperature
